# Supplementary material for: An analysis and validation pipeline for large-scale RNAi-based screens
Source: PubMed Central journal article supplement (PMC3546318; doi:10.1038/srep01076), 2013-01-16

Supplementary Material:

**Table 1: GO-identifiers and terms enriched after two weeks for over-/underrepresentation at FDR< 0.08 and 0.06 respectively.**

| overrep.   |                                          | underrep.  |                                                            |
|------------|------------------------------------------|------------|------------------------------------------------------------|
| GO:0000287 | magnesium ion binding                    | GO:0000287 | magnesium ion binding                                      |
| GO:0003674 | molecular_function                       | GO:0001843 | neural tube closure                                        |
| GO:0003676 | nucleic acid binding                     | GO:0003676 | nucleic acid binding                                       |
| GO:0003677 | DNA binding                              | GO:0003677 | DNA binding                                                |
| GO:0004672 | protein kinase activity                  | GO:0003700 | transcription factor activity                              |
| GO:0004674 | protein serine/threonine kinase activity | GO:0003713 | transcription coactivator activity                         |
| GO:0004713 | protein tyrosine kinase activity         | GO:0004842 | ubiquitin-protein ligase activity                          |
| GO:0004721 | phosphoprotein phosphatase activity      | GO:0005515 | protein binding                                            |
| GO:0004725 | protein tyrosine phosphatase activity    | GO:0005622 | intracellular                                              |
| GO:0005509 | calcium ion binding                      | GO:0005634 | nucleus                                                    |
| GO:0005515 | protein binding                          | GO:0005829 | cytosol                                                    |
| GO:0005524 | ATP binding                              | GO:0005839 | proteasome core complex                                    |
| GO:0005737 | cytoplasm                                | GO:0006350 | transcription                                              |
| GO:0005739 | mitochondrion                            | GO:0008270 | zinc ion binding                                           |
| GO:0005794 | Golgi apparatus                          | GO:0045449 | regulation of transcription                                |
| GO:0006468 | protein amino acid phosphorylation       | GO:0046872 | metal ion binding                                          |
| GO:0006810 | transport                                | GO:0051603 | proteolysis involved in cellular protein catabolic process |
| GO:0006915 | apoptosis                                |            |                                                            |
| GO:0007165 | signal transduction                      |            |                                                            |
| GO:0007243 | protein kinase cascade                   |            |                                                            |
| GO:0007275 | multicellular organismal development     |            |                                                            |
| GO:0007399 | nervous system development               |            |                                                            |
| GO:0016301 | kinase activity                          |            |                                                            |
| GO:0016740 | transferase activity                     |            |                                                            |
| GO:0030145 | manganese ion binding                    |            |                                                            |
| GO:0030154 | cell differentiation                     |            |                                                            |



**Table 2: Expression levels of selected candidate genes in the blastocyst or if not detected there in the morula and embryonic tissues according to Unigene and percentile position in certain GEO datasets comparing embryonic cells to differentiated cells; “human”: information for human homologue; “most low” means that the gene was lowly (<<25%) expressed in both differentiated and stem cells; “undifferentiated low” means the expression of the gene was low in stem cells and clearly higher in differentiated cells; genes with a red background were excluded from the analysis; >x% means all replicates of at least one probe targeting this gene were detected at a higher percentile than x.**

|         | <b>Unigene:<br/>Transcripts<br/>per million<br/>in<br/>blastocyst</b> | <b>further<br/>Unigene<br/>results</b>                | <b>GDS2666 and<br/>GDS2667 (line R1)</b> | <b>GDS2668 and<br/>GDS2669 (line J1)</b> | <b>GDS2905 and<br/>GDS2906 (line J1)</b> |
|---------|-----------------------------------------------------------------------|-------------------------------------------------------|------------------------------------------|------------------------------------------|------------------------------------------|
| Csnk1a1 | 71                                                                    |                                                       | >75%                                     | >75%                                     | >75%                                     |
| Map4k5  | 486                                                                   |                                                       | >25%                                     | >25%                                     | >25%                                     |
| Pkn2    | 100                                                                   |                                                       | >75%                                     | >75%                                     | >75%                                     |
| Ppp3r2  | 0                                                                     | 0 in embryonic tissue                                 | most low                                 | most low                                 | most low                                 |
| Rnf31   | 0                                                                     | 13 in embryonic tissue; 3 in cleavage stage or morula | >75%                                     | >75%                                     | most low                                 |
| Clk1    | 28                                                                    |                                                       | >75%                                     | >75%                                     | >75%                                     |
| Sqstm1  | 271                                                                   |                                                       | >75%                                     | >75%                                     | >75%                                     |
| Psm5    | 142                                                                   |                                                       | >75%                                     | >75%                                     | >75%                                     |
| Phf17   | 185                                                                   |                                                       | >75%                                     | >75%                                     | >75%                                     |
| Mbd2    | 14                                                                    | human: 0                                              | low                                      | undifferentiated low                     | undifferentiated low                     |
| Edd1    | no unigene entry                                                      |                                                       | >75%                                     | >75%                                     | >75%                                     |
| Hdac3   | 14                                                                    |                                                       | >75%                                     | >75%                                     | >75%                                     |
| Map3k1  | 0                                                                     | 13 in embryonic tissue; 0 in cleavage stage or morula | >50%                                     | >25%                                     | >50%                                     |
| Zxda    | no unigene entry                                                      |                                                       | most low                                 | most low                                 | most low                                 |

**Table 3: Candidate genes for which the shRNAs targeting these genes was significantly over- or underrepresented after two weeks; these genes were chosen for experimental validation.**

**Candidates for overrepresented genes:**

|         |                                                         |
|---------|---------------------------------------------------------|
| Rnf31   | ring finger protein 31                                  |
| Map3k1  | mitogen activated protein kinase kinase kinase 1        |
| Csnk1a1 | casein kinase 1, alpha 1                                |
| Pkn2    | protein kinase N2                                       |
| Clk1    | CDC-like kinase 1                                       |
| Map4k5  | mitogen activated protein kinase kinase kinase kinase 5 |

**Candidates for underrepresented genes:**

|        |                                                        |
|--------|--------------------------------------------------------|
| Edd1   | E3 ubiquitin protein ligase, HECT domain containing, 1 |
| Hdac3  | histone deacetylase 3                                  |
| Phf17  | PHD finger protein 17                                  |
| Psm5   | proteasome (prosome, macropain) subunit, alpha type 5  |
| Sqstm1 | sequestosome 1                                         |
| Hdac2  | histone deacetylase 2                                  |
| Mbd2   | Methyl-CpG binding domain protein 2                    |

**Figure 2: Edd1 expression levels compared by qPCR between cells expressing shRNA targeting Edd1, cells expression FFL and control (CCE) cells.**

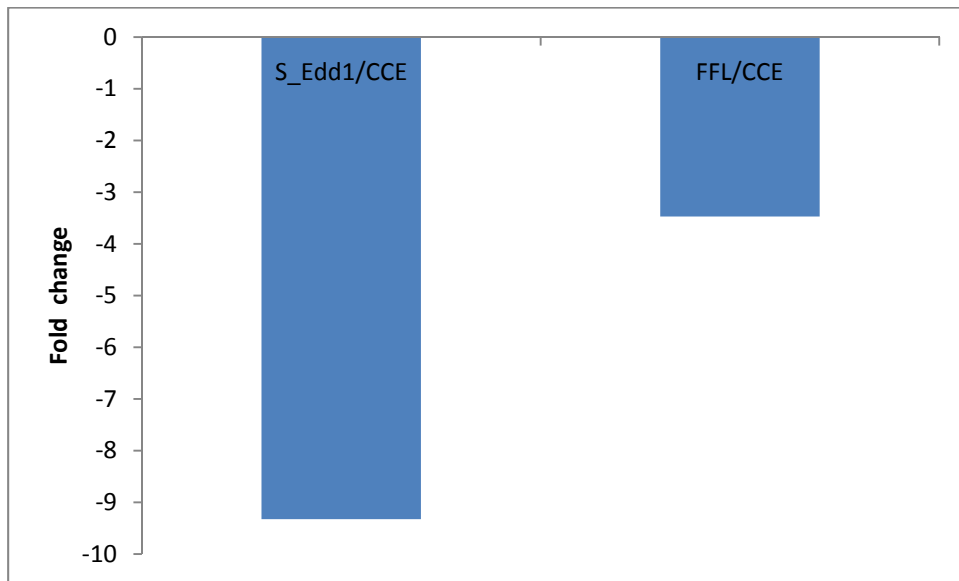

**Figure 3: Map of pHAGE-Mir lentiviral vector.**

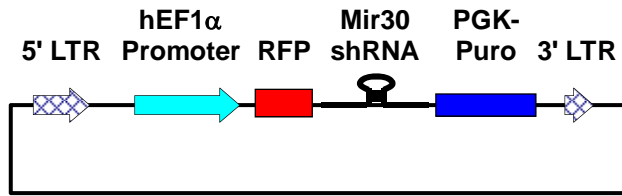

hEF1a promoter: human elongation factor 1a promoter  
RFP: red fluorescence protein turboRFP  
Mir30-shRNA: shRNA embedded in Mir30 context  
PGK-Puro: PGK promoter and Puromycin-resistant gene

**Figure 4: ES cells exposed to various levels of oxidative stress: controls, 0.5 mM, 1 mM, 2 mM, 7.5 mM, 10 mM.**

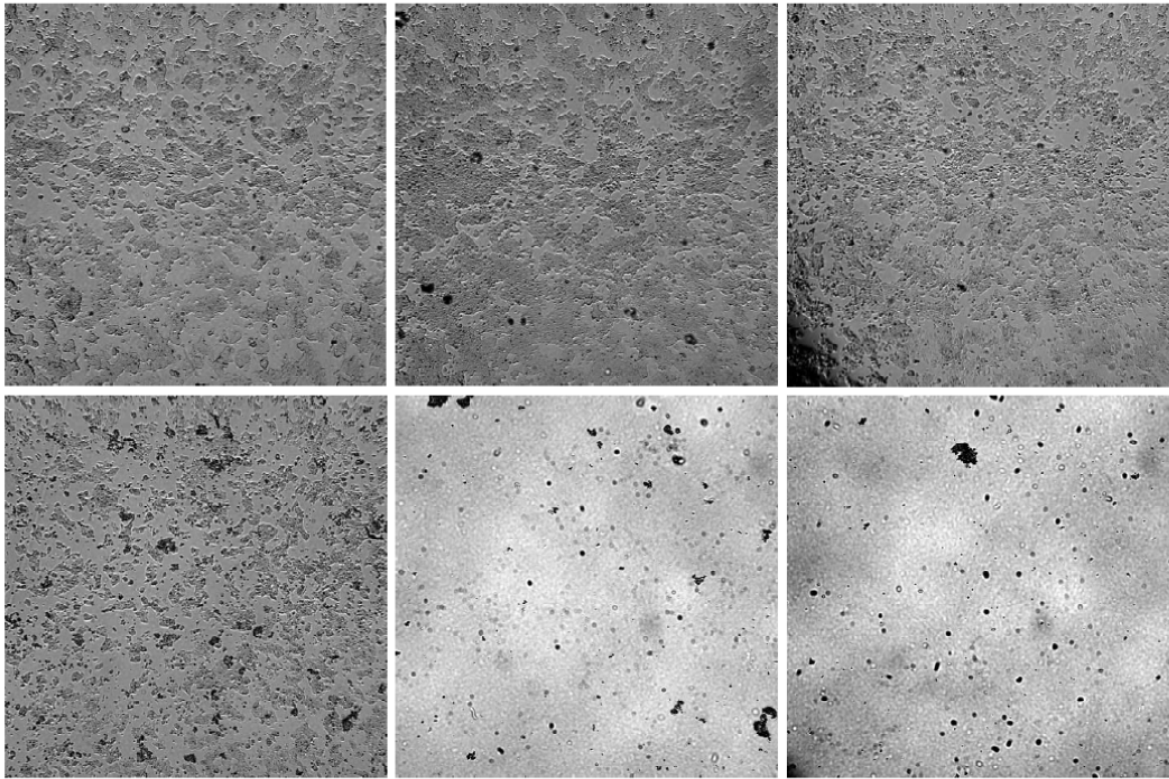

**Figure 5: Red and Green Background Corrected Signals (Non-Control Inliers). Proliferation controls are on top and stress on the bottom.**

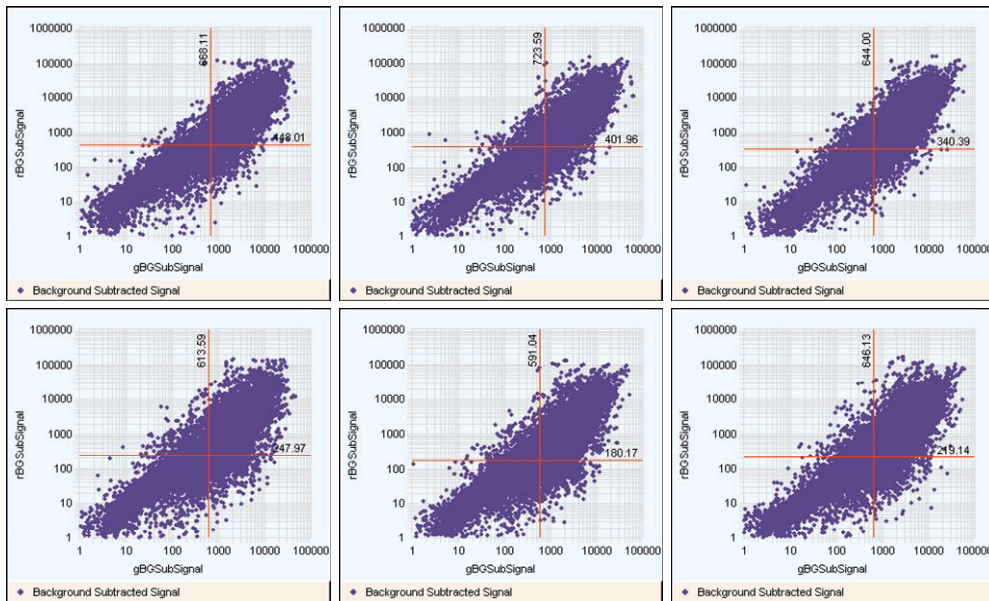



**Figure 6: M vs A Plot; LogRatio Versus AvgLogSignal. Proliferation controls are on top and stress on the bottom.**

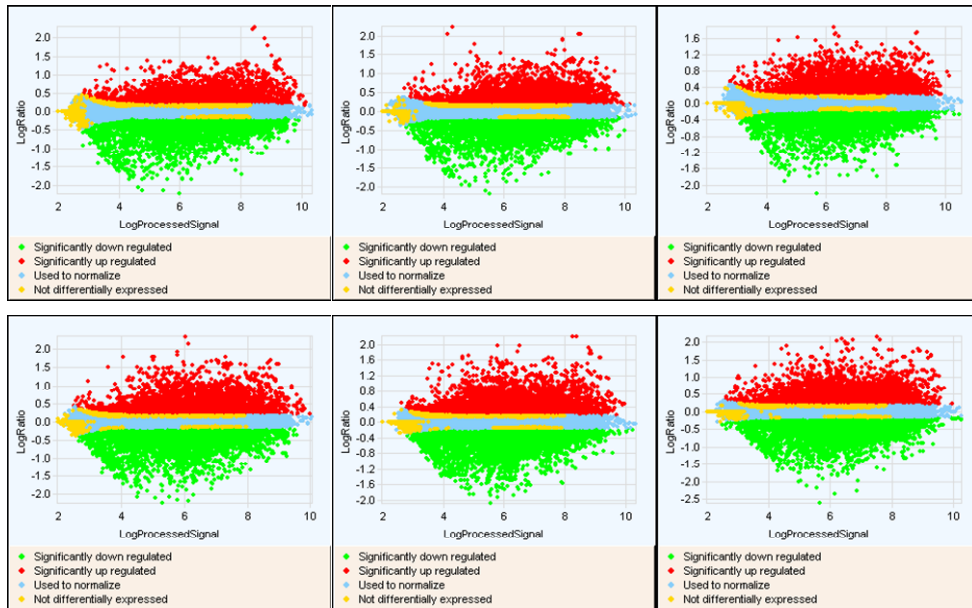

Supplement: srep01076-s1.pdf [file srep01076-s1.pdf]
